# Supplementary material for: Whole exome HBV DNA integration is independent of the intrahepatic HBV reservoir in HBeAg-negative chronic hepatitis B
Source: HighWire-hosted journal article supplement (doi:10.1136/gutjnl-2020-323300), 2020-12-21

Figure S1

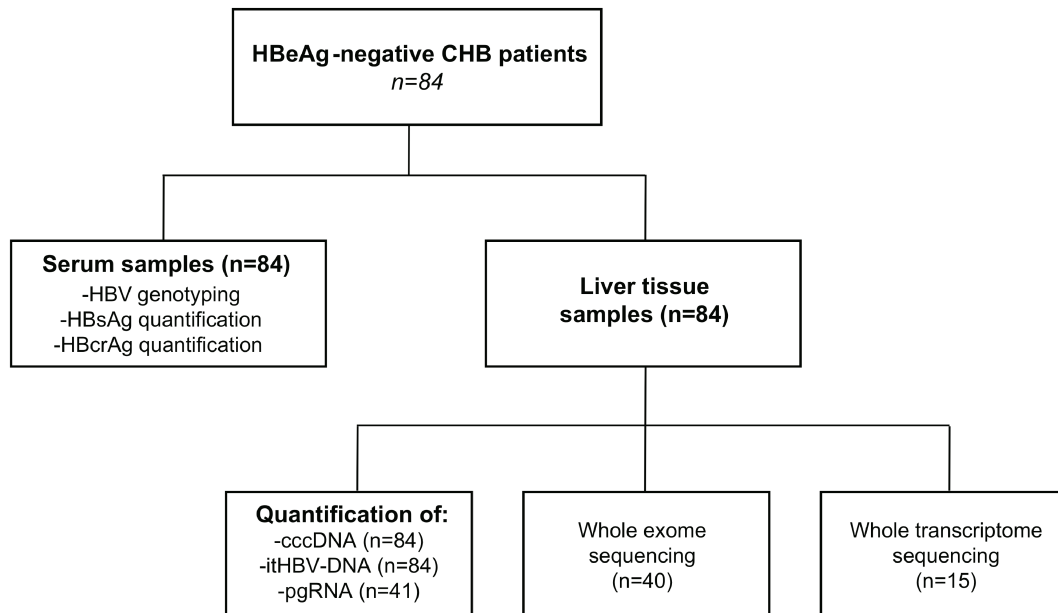

Supplement: gutjnl-2020-323300supp001_data_supplement.pdf [file gutjnl-2020-323300supp001_data_supplement.pdf]
