# Supplementary figures and images for: Whole exome HBV DNA integration is independent of the intrahepatic HBV reservoir in HBeAg-negative chronic hepatitis B
Source: PubMed Central journal article supplement — Gut. 2020 Dec 21;70(12):2337–48. doi: 10.1136/gutjnl-2020-323300 (PMC8588301; doi:10.1136/gutjnl-2020-323300), 2020-12-21

Figure S1

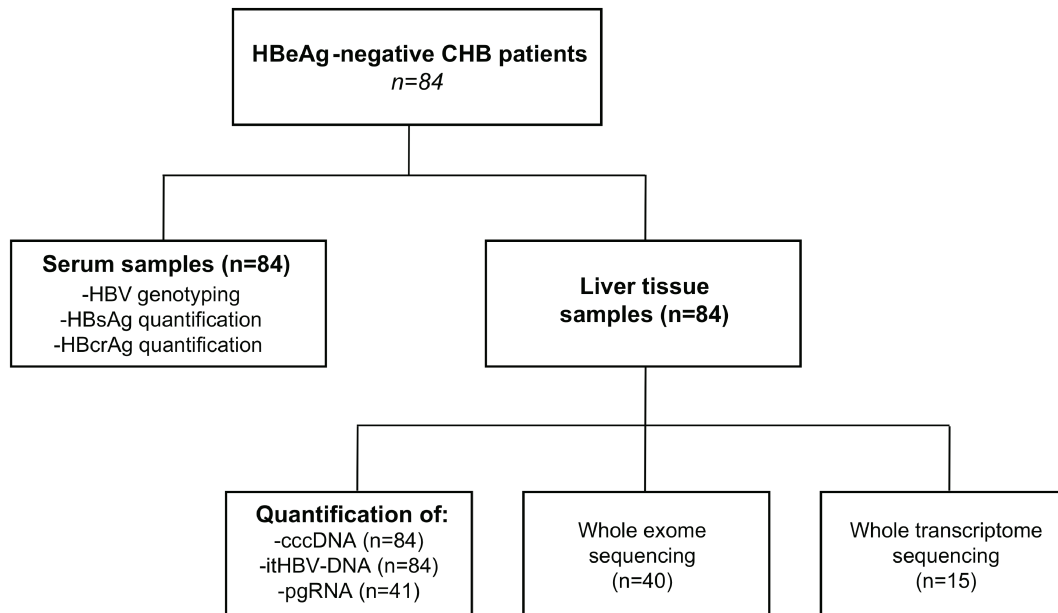

Supplement: gutjnl-2020-323300supp001.pdf [file gutjnl-2020-323300supp001.pdf]
